# Supplementary material for: Nuclear localized C9orf72-associated arginine-containing dipeptides exhibit age-dependent toxicity in C. elegans
Source: Oxford University Press journal article supplement (doi:10.1093/hmg/ddx372), 2017-09-26
Supplement: ddx372_supplemental_data.pdf [file ddx372_supplemental_data.pdf]

## **Supplemental Methods**

### **Lifespan assays**

For lifespan assays, worms grown at 20°C were picked as L4 and allowed to grow at 20°C until the next day, when 10 young adults were placed on five 3 cm plates. Lifespan assays were performed with OP50 spotted on NGM plates at 25°C. Worms were classified as alive, dead (no movement in response to touch with a wire), or censored (lost or bagged worms) once a day for lifespan assays.

### **Quantitative PCR**

L1 animals from each of the indicated genotypes were synchronized using the hypochlorite method. Animals were plated on OP50 plates and allowed to grow at 20°C for ~48 hours. 500 young adult animals were sorted into 1.5 ml tubes using a COPAS Biosort. 3 biological replicates were performed for each genotype. Purified total RNA was converted to cDNA and quantitative PCR against GFP was carried out on an ABI7500 qPCR system (Applied Biosystems, Fisher Scientific, Foster City, CA) using the SYBR green method. Samples were normalized against expression for the actin gene *act-2*. Each sample was then normalized against the expression of the GFP only control. Raw data for qPCR are included as Table S2.

### **COPAS fluorescent quantification**

Day 1 adult animals expressing each DPR-GFP transgene under the control of the *myo-3* promoter were washed off plates and analyzed using a COPAS Biosort. Fluorescent detection settings were identical for all samples. Only animals with time-of-flight measurements from 400-600 (young adults) were used for the analysis of fluorescence.

**Table S1. Raw brood size data for integrated *myo-3p::DPR* strains<sup>1</sup>**

| GFP <sup>2</sup> | GFP <sup>3</sup> | (PR) <sub>50</sub> -<br>GFP <sup>2</sup> | (PR) <sub>50</sub> -<br>GFP <sup>3</sup> | (GR) <sub>50</sub> -<br>GFP <sup>2</sup> | (GR) <sub>50</sub> -<br>GFP <sup>3</sup> | (GA) <sub>50</sub> -<br>GFP <sup>2</sup> | (GA) <sub>50</sub> -<br>GFP <sup>3</sup> | (PA) <sub>50</sub> -<br>GFP <sup>2</sup> | (PA) <sub>50</sub> -<br>GFP <sup>3</sup> |
|------------------|------------------|------------------------------------------|------------------------------------------|------------------------------------------|------------------------------------------|------------------------------------------|------------------------------------------|------------------------------------------|------------------------------------------|
| 243              | 272              | 119                                      | 0                                        | 59                                       | 0                                        | 126                                      | 45                                       | 37                                       | 10                                       |
| 173              | 218              | 28                                       | 0                                        | 63                                       | 0                                        | 133                                      | 70                                       | 30                                       | 28                                       |
| 160              | 292              | 14                                       | 0                                        | 51                                       | 0                                        | 98                                       | 33                                       | 6                                        | 37                                       |
| 235              | 290              | 24                                       | 0                                        | 46                                       | 0                                        | 97                                       | 104                                      | 46                                       | 41                                       |
| 174              | 237              | 72                                       | 0                                        | 62                                       | 0                                        | 186                                      | 98                                       | 32                                       | 39                                       |
| 188              | 289              | 40                                       | 0                                        | 27                                       | 0                                        |                                          | 157                                      | 10                                       | 46                                       |
| 151              | 258              | 156                                      | 0                                        | 45                                       | 0                                        |                                          | 61                                       | 30                                       | 66                                       |
| 159              | 269              | 42                                       | 0                                        | 72                                       | 0                                        |                                          | 112                                      |                                          | 38                                       |
| 173              | 267              |                                          | 0                                        |                                          | 0                                        |                                          | 128                                      |                                          | 36                                       |
|                  | 223              |                                          | 0                                        |                                          | 0                                        |                                          |                                          |                                          |                                          |

<sup>1</sup> – Each box indicates the total brood size for a single animal at 25°C

<sup>2</sup> – *gfp(RNAi)* bacteria

<sup>3</sup> - OP50 bacteria

Table S2. Raw quantitative PCR data

| Sample                      | GFP                 |             | act-2              |             | Std. Dev.    | $\Delta C_T$ | Std. Dev.         | $\Delta\Delta C_T$ | Std. Dev.   | gene of interest #1 | Fold Change |
|-----------------------------|---------------------|-------------|--------------------|-------------|--------------|--------------|-------------------|--------------------|-------------|---------------------|-------------|
|                             | gene of interest #1 | Std. Dev.   | endogenous control | Std. Dev.   |              |              |                   |                    |             |                     |             |
|                             | Avg. $C_T$          |             | Avg. $C_T$         |             | est - endoge |              | CT - $\Delta C_T$ |                    |             |                     |             |
| drIs33-1 (myo-3p::GFP)      | 15.2035             |             | 14.0941            |             |              |              |                   |                    |             |                     |             |
|                             | 15.2943             |             | 14.16              |             |              |              |                   |                    |             |                     |             |
|                             | 15.3458             |             | 14.1878            |             |              |              |                   |                    |             |                     |             |
| Average                     | 15.28               | 0.07        | 14.15              | 0.05        | 1.13         | 0.09         | 0.00              | 0.09               | 1.00        | 1.00                |             |
| drIs33-2 (myo-3p::GFP)      | 15.3977             |             | 14.2403            |             |              |              |                   |                    |             |                     |             |
|                             | 15.401              |             | 14.2208            |             |              |              |                   |                    |             |                     |             |
|                             | 15.34               |             | 14.1908            |             |              |              |                   |                    |             |                     |             |
| Average                     | 15.38               | 0.03        | 14.22              | 0.02        | 1.16         | 0.04         | 0.03              | 0.04               | 0.98        | -1.02               |             |
| drIs33-3 (myo-3p::GFP)      | 16.02               |             | 14.6771            |             |              |              |                   |                    |             |                     |             |
|                             | 16.0261             |             | 14.6468            |             |              |              |                   |                    |             |                     |             |
|                             | 16.0062             |             | 14.6507            |             |              |              |                   |                    |             |                     |             |
| Average                     | 16.02               | 0.01        | 14.66              | 0.02        | 1.36         | 0.02         | 0.23              | 0.02               | 0.86        | -1.17               |             |
| <b>Sample Mean</b>          | <b>15.56</b>        | <b>0.04</b> | <b>14.34</b>       | <b>0.03</b> | <b>0.91</b>  | <b>0.04</b>  | <b>0.00</b>       | <b>0.05</b>        | <b>1.00</b> | <b>1.00</b>         |             |
| drIs35-1 (myo-3p::GA50-GFP) | 17.3966             |             | 14.7113            |             |              |              |                   |                    |             |                     |             |
|                             | 17.4633             |             | 14.7465            |             |              |              |                   |                    |             |                     |             |
|                             | censored            |             | 14.7624            |             |              |              |                   |                    |             |                     |             |
| Average                     | 17.43               | 0.05        | 14.74              | 0.03        | 2.69         | 0.05         | 1.56              | 0.05               | 0.340097    | -2.94               |             |
| drIs35-2 (myo-3p::GA50-GFP) | 17.1109             |             | 14.5717            |             |              |              |                   |                    |             |                     |             |
|                             | 17.2729             |             | 14.65              |             |              |              |                   |                    |             |                     |             |
|                             | 17.1916             |             | 14.6568            |             |              |              |                   |                    |             |                     |             |
| Average                     | 17.19               | 0.08        | 14.63              | 0.05        | 2.57         | 0.09         | 1.43              | 0.09               | 0.370685    | -2.70               |             |
| drIs35-3 (myo-3p::GA50-GFP) | 19.5042             |             | 15.8019            |             |              |              |                   |                    |             |                     |             |
|                             | 19.4074             |             | 15.8645            |             |              |              |                   |                    |             |                     |             |
|                             | 19.3234             |             | censored           |             |              |              |                   |                    |             |                     |             |
| Average                     | 19.41               | 0.09        | 15.83              | 0.04        | 3.58         | 0.10         | 2.44              | 0.10               | 0.183701    | -5.44               |             |
| <b>Sample Mean</b>          | <b>18.01</b>        | <b>0.07</b> | <b>15.07</b>       | <b>0.04</b> | <b>2.94</b>  | <b>0.08</b>  | <b>2.03</b>       | <b>0.08</b>        | <b>0.24</b> | <b>-4.09</b>        |             |
| drIs37-1 (myo-3p::PA50-GFP) | 19.6007             |             | 16.5291            |             |              |              |                   |                    |             |                     |             |
|                             | 19.7229             |             | 16.5755            |             |              |              |                   |                    |             |                     |             |
|                             | 19.7259             |             | 16.5172            |             |              |              |                   |                    |             |                     |             |
| Average                     | 19.68               | 0.07        | 16.54              | 0.03        | 3.14         | 0.08         | 2.01              | 0.08               | 0.248503    | -4.02               |             |
| drIs37-2 (myo-3p::PA50-GFP) | 17.2594             |             | 15.2841            |             |              |              |                   |                    |             |                     |             |
|                             | 17.6077             |             | 15.2089            |             |              |              |                   |                    |             |                     |             |
|                             | 17.4612             |             | 15.2128            |             |              |              |                   |                    |             |                     |             |
| Average                     | 17.44               | 0.17        | 15.24              | 0.04        | 2.21         | 0.18         | 1.07              | 0.18               | 0.475132    | -2.10               |             |
| drIs37-3 (myo-3p::PA50-GFP) | 17.9511             |             | 15.5245            |             |              |              |                   |                    |             |                     |             |
|                             | 18.0802             |             | 15.569             |             |              |              |                   |                    |             |                     |             |
|                             | 18.1808             |             | 15.6256            |             |              |              |                   |                    |             |                     |             |
| Average                     | 18.07               | 0.12        | 15.57              | 0.05        | 2.50         | 0.13         | 1.36              | 0.13               | 0.388566    | -2.57               |             |
| <b>Sample Mean</b>          | <b>18.40</b>        | <b>0.12</b> | <b>15.78</b>       | <b>0.04</b> | <b>2.62</b>  | <b>0.13</b>  | <b>1.70</b>       | <b>0.13</b>        | <b>0.31</b> | <b>-3.25</b>        |             |
| drIs34-1 (myo-3p::PR50-GFP) | 15.8579             |             | 14.2747            |             |              |              |                   |                    |             |                     |             |
|                             | 15.8677             |             | 14.2701            |             |              |              |                   |                    |             |                     |             |
|                             | 15.7411             |             | 14.235             |             |              |              |                   |                    |             |                     |             |
| Average                     | 15.82               | 0.07        | 14.26              | 0.02        | 1.56         | 0.07         | 0.43              | 0.07               | 0.743085    | -1.35               |             |
| drIs34-2 (myo-3p::PR50-GFP) | 16.1955             |             | 14.3932            |             |              |              |                   |                    |             |                     |             |
|                             | 16.0605             |             | 14.3669            |             |              |              |                   |                    |             |                     |             |
|                             | 16.0641             |             | 14.3544            |             |              |              |                   |                    |             |                     |             |
| Average                     | 16.11               | 0.08        | 14.37              | 0.02        | 1.74         | 0.08         | 0.60              | 0.08               | 0.659160    | -1.52               |             |
| drIs34-3 (myo-3p::PR50-GFP) | 15.5868             |             | 14.1291            |             |              |              |                   |                    |             |                     |             |
|                             | 15.6687             |             | 14.1844            |             |              |              |                   |                    |             |                     |             |
|                             | 15.7666             |             | 14.1921            |             |              |              |                   |                    |             |                     |             |
| Average                     | 15.67               | 0.09        | 14.17              | 0.03        | 1.51         | 0.10         | 0.37              | 0.10               | 0.772925    | -1.29               |             |
| <b>Sample Mean</b>          | <b>15.87</b>        | <b>0.08</b> | <b>14.27</b>       | <b>0.03</b> | <b>1.60</b>  | <b>0.08</b>  | <b>0.69</b>       | <b>0.08</b>        | <b>0.62</b> | <b>-1.61</b>        |             |
| drIs28-1 (myo-3p::GR50-GFP) | 17.4236             |             | 14.5822            |             |              |              |                   |                    |             |                     |             |
|                             | 17.5541             |             | 14.4986            |             |              |              |                   |                    |             |                     |             |
|                             | censored            |             | 14.7204            |             |              |              |                   |                    |             |                     |             |
| Average                     | 17.49               | 0.09        | 14.60              | 0.11        | 2.89         | 0.15         | 1.75              | 0.15               | 0.296366    | -3.37               |             |
| drIs28-2 (myo-3p::GR50-GFP) | 17.2437             |             | 14.509             |             |              |              |                   |                    |             |                     |             |
|                             | 17.0185             |             | 14.4762            |             |              |              |                   |                    |             |                     |             |
|                             | censored            |             | 14.452             |             |              |              |                   |                    |             |                     |             |
| Average                     | 17.13               | 0.16        | 14.48              | 0.03        | 2.65         | 0.16         | 1.52              | 0.16               | 0.349137    | -2.86               |             |
| drIs28-3 (myo-3p::GR50-GFP) | 17.0882             |             | 14.5592            |             |              |              |                   |                    |             |                     |             |
|                             | 17.0607             |             | 14.7095            |             |              |              |                   |                    |             |                     |             |
|                             | 17.0394             |             | 14.6388            |             |              |              |                   |                    |             |                     |             |
| Average                     | 17.06               | 0.02        | 14.64              | 0.08        | 2.43         | 0.08         | 1.29              | 0.08               | 0.408092    | -2.45               |             |
| <b>Sample Mean</b>          | <b>17.23</b>        | <b>0.09</b> | <b>14.57</b>       | <b>0.07</b> | <b>2.66</b>  | <b>0.13</b>  | <b>1.74</b>       | <b>0.12</b>        | <b>0.30</b> | <b>-3.34</b>        |             |
| N2-1 (No dipeptide)         | 27.2311             |             | 14.1427            |             |              |              |                   |                    |             |                     |             |
|                             | 27.2934             |             | 14.1264            |             |              |              |                   |                    |             |                     |             |
|                             | censored            |             | 14.1143            |             |              |              |                   |                    |             |                     |             |
| Average                     | 27.26               | 0.04        | 14.13              | 0.01        | 13.13        | 0.05         | 12.00             | 0.05               | 0.000244    | -4097.56            |             |
| N2-2 (No dipeptide)         | 28.9943             |             | 14.178             |             |              |              |                   |                    |             |                     |             |
|                             | 28.946              |             | 14.1793            |             |              |              |                   |                    |             |                     |             |
|                             | censored            |             | 14.1613            |             |              |              |                   |                    |             |                     |             |
| Average                     | 28.97               | 0.03        | 14.17              | 0.01        | 14.80        | 0.04         | 13.66             | 0.04               | 0.000077    | -12974.43           |             |
| N2-3 (No dipeptide)         | 28.6223             |             | 14.1151            |             |              |              |                   |                    |             |                     |             |
|                             | 28.5189             |             | 14.1201            |             |              |              |                   |                    |             |                     |             |
|                             | censored            |             | 14.1567            |             |              |              |                   |                    |             |                     |             |
| Average                     | 28.57               | 0.07        | 14.13              | 0.02        | 14.44        | 0.08         | 13.31             | 0.08               | 0.000099    | -10128.03           |             |
| <b>Sample Mean</b>          | <b>28.27</b>        | <b>0.05</b> | <b>14.14</b>       | <b>0.02</b> | <b>14.12</b> | <b>0.05</b>  | <b>13.21</b>      | <b>0.05</b>        | <b>0.00</b> | <b>-9475.92</b>     |             |

**Table S3. Nucleotide sequences of codon-varied dipeptide sequences used in this study**

|                                                                                                                                                                                                                                                                                                                                                                                                                          |
|--------------------------------------------------------------------------------------------------------------------------------------------------------------------------------------------------------------------------------------------------------------------------------------------------------------------------------------------------------------------------------------------------------------------------|
| <p><b>(PA)<sub>50</sub></b><br/> <b>aagctt</b>gggcccggccccggctccggcacctgcgcccgtccagcaccggcgctgctcccgcaccagctcctgcacccgcgca<br/> gcacccgctccagcgcctgctcctgcaccggctcccgcgccagcacctgctccggcgcccgcaccagctcctgccccggcccc<br/> ggctccggcacctgcgcccgtccagcaccggcgctgctcccgcaccagctcctgcacccgcgccagcaccgctccagcg<br/> ctgctcctgcaccggctcccgcgccagcacctgctccggcgcccgcaccagctcctgccccgggttggtaccgagctc<b>ggatcc</b></p>            |
| <p><b>(GA)<sub>50</sub></b><br/> <b>aagctt</b>ccccggggccggtgccggagcaggcgctggtgcggggcgccggagctggtgcaggcgccggagccgggtgctggcgc<br/> aggagcgggtgcaggcgccgggtgccggagctggcgaggagcgggtgctggcgccggagcaggtgcggcgctggggcc<br/> ggggccggtgccggagcaggcgctggtgcggggcgccggagctggtgcaggcgccggagccgggtgctggcgaggagcgg<br/> gtgcaggcgccgggtgccggagctggcgaggagcgggtgctggcgccggagcaggtgcggcgctggggccggctggtac<br/> cgagctc<b>ggatcc</b></p> |
| <p><b>(PR)<sub>50</sub></b><br/> <b>aagctt</b>ggccggccccggccgctcctcgcccacgaccgagacctgctccacgcccgcgacctagaccacggccgcgacct<br/> cgaccaagacctgccccgagaccacgacctgctccgcgccaagacctcgaccgctccacgccctagaccgcgacccccg<br/> gccccggccgctcctcgcccacgaccgagacctgctccacgcccgcgacctagaccacggccgcgacctcgaccaagacc<br/> tcgcccgagaccacgacctgctccgcgccaagacctcgaccgctccacgccctagaccgcgacccccggggtaccgagc<br/> tc<b>ggatcc</b></p>        |
| <p><b>(PR)<sub>25</sub></b><br/> <b>aagctt</b>ccccggccgctcctcgcccacgaccgagacctgctccacgcccgcgacctagaccacggccgcgacctcgacca<br/> agacctgccccgagaccacgacctgctccgcgccaagacctcgaccgctccacgccctagaccgcgacccccggggtac<br/> cgagctc<b>ggatcc</b></p>                                                                                                                                                                              |
| <p><b>(PR)<sub>15</sub></b><br/> <b>aagctt</b>ccgcccctcgaccaagacctgcccgagaccacgacctgctccgcgccaagacctcgaccgctccacgcacct<br/> agaccgcgacccccggggtaccgagctc<b>ggatcc</b></p>                                                                                                                                                                                                                                                |
| <p><b>(PR)<sub>5</sub></b><br/> <b>aagctt</b>ccgctccacgccctagaccgcgacccccggggtaccgagctc<b>ggatcc</b></p>                                                                                                                                                                                                                                                                                                                 |
| <p><b>(GR)<sub>50</sub></b><br/> <b>aagctt</b>gccccggggccggggccggtggtcgcggacgaggcagaggtcgtggacgcggccgaggtagaggacgtggccgcg<br/> gtcgaggaagaggtcgcggcagaggacgaggtcgtggccgcggaagaggtcgaggccgtggacgcggtagaggccgag<br/> gccggggccggggccggtggtcgcggacgaggcagaggtcgtggacgcggccgaggtagaggacgtggccgcggtcaggg<br/> aagaggtcgcggcagaggacgaggtcgtggccgcggaagaggtcagggccgtggacgcggtagaggccgagggccg<br/> gtaccgagctc<b>ggatcc</b></p>  |

**Red** – *HindIII* and *BamHI* cloning sites

**Table S4. Nucleotide sequences of promoters and targeting sequences used in this study**

|                                                                                                                                                                                                                                                                                                                                                                                                                                                                                                                                                                                                                                                                                                                                                                                                                                                                                                                                                                                                                                                                                                                                                                                                                                                                                                                                                                                                                                                                                                                                                                                                                                                                                                                                                                                                                                                                                                                                                                                                                                                                                                                                                                                                                                                                                                                                                                                                                                                                                                                                                                                                                           |
|---------------------------------------------------------------------------------------------------------------------------------------------------------------------------------------------------------------------------------------------------------------------------------------------------------------------------------------------------------------------------------------------------------------------------------------------------------------------------------------------------------------------------------------------------------------------------------------------------------------------------------------------------------------------------------------------------------------------------------------------------------------------------------------------------------------------------------------------------------------------------------------------------------------------------------------------------------------------------------------------------------------------------------------------------------------------------------------------------------------------------------------------------------------------------------------------------------------------------------------------------------------------------------------------------------------------------------------------------------------------------------------------------------------------------------------------------------------------------------------------------------------------------------------------------------------------------------------------------------------------------------------------------------------------------------------------------------------------------------------------------------------------------------------------------------------------------------------------------------------------------------------------------------------------------------------------------------------------------------------------------------------------------------------------------------------------------------------------------------------------------------------------------------------------------------------------------------------------------------------------------------------------------------------------------------------------------------------------------------------------------------------------------------------------------------------------------------------------------------------------------------------------------------------------------------------------------------------------------------------------------|
| <p><b>Myo-3 promoter - FLAG</b></p> <p><b>aagctt</b>gtttgatgaaaaccaatgaacaagtgattatagtctctgttttcgtaattttgaattttgcttgataaggctgcaacaaagatcaggttgacatatattttcagtaattattttaacctgactctatcactgccggctataataagttcttgaataaaataatttcccagacaaacatgagtgattttctcgaaaataaaaagtgaggctaatagagattattctgtaattaactgcataattgtcacgtgccatagttttacattccactacgtcatagttcttaaaataactatctcctgaaaatagaagtaggtgaagaaagtttaattatcagttctaaaatgacaattgatctttggaatatgttctgaaactaccgatcattgaacagatgctattgaaatgatatagaattgtatatttgcaatttctgaaacgcgtcttaaaggcacacagattaattcaaaaagggtctggccgcaaaaagggttatggtggccgattttgagttttgtgtgattgcttttcacaatcagtgtttcaggattatgtgatgaactagatcttcaagtttcgttacatttcatatgttttcggaactcacgaagtacatattgggtattgtgtcaaaaaaattcagcaatcagcttcgctccgctgactttagaacccaaaaaaatagtatggccaaactgactgtgttacgatcatttcaattttcaatacatatttaagatttctaagagtaagaaggcaaaaactgttctggaatacatatataattttcagggtacaattagtcaaaaagtgactgaaatatacgttttaatttcacgaataacccaattagttcaatgtatttttgtcaaccaacgttaaagttggctccaaccaattatcatttctgatcaaccacaatgtttttcttctgcaagtaattttttatccagatgtttggcatattttcaattcttcac tagcgcctacttctgcaactccggcgccctgaatctaataatgcatctgttgcaagaattgaaagaccaatcaacacattgtttcttcacg agatactgaagaaaatgaataaaaaacagagaaaaagagccatgtgattagtgaacactgttgtaacagataccatagcttggactgttgatggtcaacaaatgattgcagaggggtgcaaaacagtcagtcgagaaaaatgaaaa acagaaaaacaaagaacagaaaaatgggttgagagtcagtataattataaaagaaaaatgtacatagaaattaaccattttgt agaagaagttattttcaagcatcgttaaaaattatcaaagcacctatttcatatttaatttaaacatggtaaataaacaacacgggt gcgcaatcaggaaaactgaaatctgaaactgtgtgtgatcttctcgcaactgttcagatagcactagtgaatgtaagagtgcg cgaatataatggaatataatggatcacacctcctgccatcaggtaaacgtctctgttatcacatattccaactattaattttacctttta cagttttacattttttgaaaaagtaactttttgcttcaaaatccctgacgaaaaatcaaatattttaacgagactgcagaggaacc gattgatgattggaaaatccagctttacctgtgtaagaactgaaaagttcataaccctagggtattcccagttacattcccactggc taacaatagcaccagtttttcatcacctttctcaatttctcggcgattgttaaaaaacaaaattgtgtcccttctctgatctctatgct tctaaacacaagttcatcggaaaacgaaggaggttaggtgtgtgggtcctccgaagtgaataatagaagagcaagaatagaa tattagagagagagtgagagagggcgggatagctcccgggattccgtttcttcttcttcttcaacgatgatgtgtgctgtgtg atagattctgttctccccacaactcgtccgaaggctcaatacaattcaattgatattggaggagagcctaccggagtgagggagg ataagaagaacataagaagaagaagaagaagcatgctctggttttgatgctatgaaaacggcacaacaaagatgattg aggtccctttcaataccttctctcatcttcaaatcccattgaaacctaataacttctaccacgcttaccattgtctcaaaaaactata gcaatgtctataactttttatctctgaaaagcagtggtccattttcttttctattttcaattgtttctcacatttcgttggattctgtgtgt caaccagcttcttccactttaccgtctaatttcagggcagggagccatcaaacccagaccactagatccatctagaaATGg attacaaggatgacgacgataaag<b>aagctt</b></p> |
| <p><b>Myo-3p-signal sequence-transmembrane-FLAG</b></p> <p><b>aagctt</b>gtttgatgaaaaccaatgaacaagtgattatagtctctgttttcgtaattttgaattttgcttgataaggctgcaacaaagatcaggttgacatatattttcagtaattattttaacctgactctatcactgccggctataataagttcttgaataaaataatttcccagacaa aacatgagtgattttcttcgaaaataaaaagtgaggctaatagagattattctgtaattaactgcataattgtcacgtgccatagttttac attccactacgtcatagttcttaaaataactatctcctgaaaatagaagtaggtgaagaaagtttaattatcagttctaaaatgacaatt gatctttggaatatgttctgaaactaccgatcattgaacagatgctattgaaatgatatagaattgtatatttgcaatttctgaaacgcgtt cttaaaggcacacagattaattcaaaaagggtctggccgcaaaaagggttatggtggccgattttgagttttgtgtgattgcttttcac aatcagtgtttcaggattatgtgatgaactagatcttcaagtttcgttacatttcatatgttttcggaactcacgaagtacatattgggtatt gtgtcaaaaaaattcagcaatcagcttcgctccgctgactttagaacccaaaaaaatagtatggccaaactgactgtgttacgatca tttcaattttcaatacatatttaagatttctaagagtaagaaggcaaaaactgttctggaatacatatataattttcagggtacaattagtc aaaaagtgactgaaatatacgttttaatttcacgaataacccaattagttcaatgtatttttgtcaaccaacgttaaagttggctcca aaccaattatcatttctgatcaaccacaatgtttttcttctgcaagtaattttttatccagatgtttggcatattttcaattcttcac tagcgcctacttctgcaactccggcgccctgaatctaataatgcatctgttgcaagaattgaaagaccaatcaacacattgtttcttcacg agatactgaagaaaatgaataaaaaacagagaaaaagagccatgtgattagtgaacactgttgtaacagataccatagcttggactgttgatggtcaacaaatgattgcagaggggtgcaaaacagtcagtcgagaaaaatgaaaa acagaaaaacaaagaacagaaaaatgggttgagagtcagtataattataaaagaaaaatgtacatagaaattaaccattttgt agaagaagttattttcaagcatcgttaaaaattatcaaagcacctatttcatatttaatttttaaacatggtaaataaacaacacgggt gcgcaatcaggaaaactgaaatctgaaactgtgtgtgatcttctcgcaactgttcagatagcactagtgaatgtaagagtgcg cgaatataatggaatataatggatcacacctcctgccatcaggtaaacgtctctgttatcacatattccaactattaattttacctttta cagttttacattttttgaaaaagtaactttttgcttcaaaatccctgacgaaaaatcaaatattttaacgagactgcagaggaacc</p>                                                                                                                                                                                                                                                                                                                                                                                                                                                                                                                                                                                                                                                                                                                                                                                                          |

gattgatgatttgaaaaatccagctttacctgtgtaagaactgaaaagtttcataaccctagggattcccagttacattccccactggc  
taacaatagcaccagttttcatcacctttctcaaatttctcggcgatttgtaaaaaacaaaattgtgtcccttctctgatctctatgtc  
tctaaacacaagttcatcggaaaaacgaaggagggtaggtgtggtgggtccccgaagtgaaaatagaagagcaagaatagaa  
tattagagagagagtgcagagagggcgggatagctcccgggattccgttttcttcttcttcaacgatgatgtgtgtcgtgtgtg  
atagattctgtgtccccacaactcgtccgaaggctcaatacaattcaattgatattggaggagagcctaccggagtgaggagg  
ataagaagaacataagaagaagaagaagaagcatgctctggttttgatgctatgaaaacggcacaacaaaagatgattg  
aggtccctttcaataccttctcatcttcaaatcccattgaaacctaaaacttctcaccacgctttaccattgttctcaaaaaactata  
gcaatgtctataactttttatctctgaaaagcagtggtccattttcttttctattttattcaattgtttctcacatttcggttgattcttgcctgt  
caaccagcttcttccactttaccgtctaatttcagggcagggagccatcaaaccacgaccactagatccatctagaaATGc  
**cacftcaacatcattgctgctcctcgagcacttctccattcgtttaccagcaagcgattggaagactggagaagtca  
ctccggataatgcaacagctcgggtcagaaaacataaagattgtcctccactgtccctgtgctcgaattgtgctcgga  
gtcattgctgggtatcgtaatcctcggaattcttcttgttgcctcggaaattgctcacagacttcatgatagatccgaggta  
ccggtagaaaaa**gattacaaggatgacgacgataa**agcctt**

**Myo-3p-GFP-FLAG-his-58**

**agcctt**gttgatgaaaaccaatgaacaagtattatagctctgttttcgtaattttgtaattttgcttgataaggctgcaacaaagat  
caggttgacatatatttcagtaatttatttaacctgtactctatcactgcccgtataataagttctgaataaaataattttccgacaa  
aacatgagtattttctgaaaaataaaagtgcaggctaatagagattattctgtaattaactgcataattgtcacgtgccatagtttac  
attccactacgtcatagttcttaaaataactatctcctgaaaaatagaagtaggtgaagaaagttaattatcagttctaaaatgacaatt  
gatctttggaatatgttctgaaactaccgatcattgaacagatgctattgaaatgatataagaattgtatattttgcaatttctgaaacgctt  
ctaaaggcacacagattaattcaaaaagggtctggccgcaaaaaggttatgggtggccgattttgagttttgtgtgattgcttttcac  
aatcagtgtttcaggattatgtgatgaactagatctcaagtttcgttacatttcatatgttttcggaactcacgaagtcacatattgggtatt  
gtgtcaaaaaatcagcaatcagcttcgctccgtgactttagaaccccaaaaaatagtatggccaaactgactgtgttacgatca  
ttcaattttcaatacatatttaagatttctaagagtaagaaggcaaaaactgttctggaatacatatattttcaggttacaattagtc  
aaaaagtgactgaaatatacgttttaatttcacgaataacccaattagttcaatgtatttttgcaaccaacgtaaaagtttgctcc  
aaccaattatcatttctgatcaaccacaatgtttttcttctctgcaagtaattttttatccagatgtttggcatattttcaattctcac  
tagcggccacttctgcaactcggcgccctgaatctaataatgcatctgttgaagaattgaaagaccaatcaacacattgtttctcacg  
agatactgaagaaaatgaataaaaacagagaaaaagagccatgtgattagtgaacactgttctaacagataccatagcttggg  
cttggtacgtgatggcaacgtatgggtcaacaaaaatgattgacagaggggtgcaaaaacagcaagtcgagaaaaatagaaaa  
acagaaaaacaaagaacagaaaaatgggttgagagtcagtataatttataaaagaaaaatgtacatagaaattaaccattttgt  
agaagaagttattttcaagcatcgttaaaaattattcaaaagcacttatttcatatttaattttaaactggttaaatgaacaacacggt  
gcaatcaggaaaactgaaatctgaaactgtgtgtgatcttctcgaactgttcagatagcactagttaattgtaagagtgcg  
cgaatataatggaatataatggatcacacctcctgccatcaggtaaacgtctctgttatcacatatttccaactataaattttacccttta  
cagttttacatttttgaaaaagtaacttttcttcaaaaatccctgacgaaaatatacaatattttatcagactgcagaggaacc  
gattgatgatttgaaaaatccagctttacctgtgtaagaactgaaaagtttcataaccctagggattcccagttacattccccactggc  
taacaatagcaccagttttcatcacctttctcaaatttctcggcgatttgtaaaaaacaaaattgtgtcccttctctgatctctatgtc  
tctaaacacaagttcatcggaaaaacgaaggagggtaggtgtggtgggtccccgaagtgaaaatagaagagcaagaatagaa  
tattagagagagagtgcagagagggcgggatagctcccgggattccgttttcttcttcttcaacgatgatgtgtgtcgtgtgtg  
atagattctgtgtccccacaactcgtccgaaggctcaatacaattcaattgatattggaggagagcctaccggagtgaggagg  
ataagaagaacataagaagaagaagaagaagaagcatgctctggttttgatgctatgaaaacggcacaacaaaagatgattg  
aggtccctttcaataccttctctcatcttcaaatcccattgaaacctaaaacttctcaccacgctttaccattgttctcaaaaaactata  
gcaatgtctataactttttatctctgaaaagcagtggtccattttcttttctattttattcaattgtttctcacatttcggttgattcttgcctgt  
caaccagcttcttccactttaccgtctaatttcagggcagggagccatcaaaccacgaccactagatccatctagaaATG**a  
gtaaaggagaagaactttcactggagttgtcccaattctgttgaattgatgggtgatgtaattgggcacaaattttctgctagtgag  
aggggtgaaggatgcaacatacggaaaacttacccttaatttatttgcactactggaaaactacctgttccatgggtaagtttaa  
catatataactaactaacctgattatttaattttcagccaacactgtcactactttctgttatgggttcaatgcttctcgagataccca  
gatcatatgaaacggcatgacttttcaagagtgccatgcccgaagggtatgtacaggaaaagaactataattttcaagatgacggg  
aactacaagacacgtaagtttaaacagttcggfactaactaacatacatatttaattttcaggtgctgaagtcaagtttgaaggta  
taccctgttaatagaatcgagttaaaaggattgttttaagaagatggaacattcttgacacaaattggaatataactataact  
cacacaatgtatacatatgagcagacaacaaaagaatggaatcaaaagttgtaagtttaaacatgattttactaactaactatctg  
atttaattttcagaacttcaaaatgacacaacattgaagatggaagcgttcaactagcagaccattatcaacaaaactcaca  
ttggcgatggcctgtcctttaccagacaaccattaccgtccacacaatctgcctttcgaagatccaacgaaaagagagac  
cacatggtccttctgagttgtaacagctgctgggattacacatggcatggatgaaactatacaaa**gattacaaggatgacgacgat  
aaqatgccaccaagccatctgccaagggagccaagaaggccgccaagaccgtcgttccaagccaaggacgga

**aagaagagacgtcatgccgcaaggaatcgtactccgtctacatctaccgtgttctcaagcaagttcaccagacaccg  
gagtcctccaagccatgtctatcatgaactccttctcaacgatgtattcgaacgcacgttcggaagcttcccgct  
tgctcattacaacaacgctcaacgatctcatcccgcgaattcaaacgctgtccggttgattctccaggagaactgc  
caagcacgccgtgtctgaggaaccaaggccgtcaccaagtacactccagcaag**aagctt****

**Unc-47p-FLAG**

**aagctt**cgtagctctcaagattggataaattatgtagagtgaaaaatagtggaatagataaattttgaaaatattgggctc  
catccagagtcattttccggagtcactcaaatagtttcagaaaaattggacttgaagatgtagagctttgtgcatacagaatta  
gaataaataaaattgggtagaacattttctgtaaatttcagagttaattggcaaaagactgttgattgactttgactggaaaa  
aaaggctatagtcacagaaaaactattttccagaaagttattttccaaaatttaattgtacaataaagaattaacatgaagatgga  
aatgtcaattttcagtaaaaaattacaaaaatatctataaacaagtaaactactacaactacaaaaagaatgaaaacaaaaca  
aattggaagtaatgcaaaacaaaaaatgaatgagcgtctgctgagctctctctctctctctctctctctctctctctctctct  
tgctagcagccactttgtgtgaaggggtagaagaagagaaagagagaccgaaacataaagacatagacaacacggctct  
cctccactctatacacactctctgtcttctctctctctctctgctggcttcaagcaacggacacggccgaaagcagaagccgtgcagaa  
aaaaagaagaagaagaaaaagaaaagagctgtggcacaacaaaatggatgttctctgtagcaatggcggttgctc  
cgcgagagcgcgggaggggaaattgggagacaaaaagttaattgacttgacaatacagcgatataattcagattactgtgacg  
ggaagattgtgacatggggaatggaagaatgaagatcctcaacgttttcggaacagttgtacgatatgattttccagggtactaaa  
acattaaaactgtcaaaggggtacagcatgttgcacttcaaactttcaatgcataaatttctgtcagatctgacctctatacttg  
aagttataccgataaaggtttcaacagattttgaagcatttgaatcaggggtgctgggtaaacctatcacaactgcaactgccaatt  
gtcctgtgaatcgtatctataaaacaagactgaaaaataactaaacttctcgtcaaaaaagtgacaaaacaactttctggaaaaa  
aagctgtgggatcccggaacagtcgaaagtcggtggcaagcgcgaactgtgacggctaaaccggggcacaactcaggggt  
gagcggcaaacgattttccggcaaatcggcaaatcggcaaatgccaatattgaaatacccggcaaatcggtaaatagccgga  
attgaaaattccggcaaacgcaaatgctgattgccaatggcgaatggcgggaagacggcaattgccaacatattcggc  
aaattgtggtttgacttttgaaatttcagaatttcaatcggcaaatgtgcacatctatgaatttctacatctattttgaaaagtaa  
gcaattctatgaaaatactaaagaaaaatgaaaaattttcaaaaaggcacagtttaagtgttccgtctaataaaaaaatcc  
ccctaaacacttccggcaaatgatgtcggcaaatggcaaatcggcaaacctggcaaaattacagtttccggtaaatcggcaaac  
cggcaaacctgctgaattgaaaagtccgtcaaatcggcaaacccgcaaacacccctggcacaatgatggacatactgaggca  
atttccgggtttccaattgcaggaaatttcaattccggcagtggtccgattgccgaaattttaattcaggcaaatgccgatttccc  
atttcccgattgccggaaaaaatcgtttgcccacccctgggtctgaaccttgattgtacaaaacatttttagctctttggagaaat  
aaaatgaatctgtaaaatttaattgacgaggacgatattagctgtcttttagaccaaaattcagaaaaaaagaagaatactccc  
aaatttccggtcccctctcgtttttttgccaataaactcactatagtcgtgttccccctattcacaatttattaccaatccatcagtgg  
aaccagaaaaagaagagcccttcggtttggagagtgggtctaataatccccgtgctctcaaatcattgtccaacacacaga  
cacactttatgtgtctcacacacacacgctattgaagagcgaagacgacgacgacgacgacattcagagctttccacgaaatttgc  
ccatcttccacaatctgtcttctgtgagacgacgcgtcacatttatttattacagATGgattacaaggtgacgacgataa**ga**  
**aagctt**

**Hsp-16.2p-FLAG**

**aagctt**gcaactcataattttggaagtcgacaaaaaaaatgtttttcgacatttttatgttttaattttgtttaaattattgtattaaac  
agtgtaggggtcgaacatgctgacatttcttaaaattctcaaaagctgatttttcaaaaatttggcactttgcaaaaactttgcccg  
aaattatgaaaaatcaaaaaattttaaagtgtttatgatattcgggtgttttgatcataataagtcatttgcaaaaatccccac  
tgcgctactccaccttaaggtgtgaggccaattttcttcttttaagtgaattttttctgttcccctaccctaactgaaaattca  
ttcaggttttataaaatttaacaagagtacaactttcaaaaattcggagacatgcactatttttgggtgccagcatcgtcaggag  
cgtgaaatttctgaaacttgggtgtatggtggcgacatacagatttttcaattgccgaaatttttgcaaaattgctgctttgcaat  
ttgaaatttcaaatatccaattcaatctgcaaaatagtcgcatcctataaaatattcttacaagtaagcaaatctatgaaattatct  
aaaaaatcggggaaacatttcaaacggcacagtttaagttttctgtctataaaaaatctctcaaacatttctgcttctctatgt  
gaaatccggcaaatctgataccggcaaacggcaaatcggaaattgcccgaacttaaaatttccggcaaatcggcaaacgg  
caatttcccaaatgtgaccactgcccacttctggtatgtatgctatttttttttggaaagaaggattcaaatattttacggagaa  
gtttggagtcaggaggatctggaatctcttgaacttgaatataaaacccgtttcactctgaaactcagttgtgaattccatgaaag  
agtgtggcgaattcaaatgcaatgacgagacataataataataattattattattccctttctcgaatcacaatggaacattt  
caaatttacatgaaaaagaagaacaaataaagtgtctcttcaacaaaagtgttaattgtttgcaacaaaattgatcggaaat  
agaacgtgatgattgtcttcttggagcctcaatttggagtttctctcattcgaaatggcagattgacagaaggtaaatcagcatct  
ctggtagaagaatcattttgaaaatgagcgttcaagatccatgttccgattttgttcttgaatccctcaattttgagctctctccatcta  
atttaatttaagattttctggttgaaatgagagacatcgagtgaaccgaaaactggattcatatttacaatctgaaaaaaaagaa  
cacaattttaccaattgaaaatgaaattatgatgcttacttaccctcccaatattatcggaaaaattgaatgagttgtatcagcattt  
tccaatcggaaattgaacagatccagtgagttcgtccaagaaatgatcaagagcatttgaatcagaatattggagaacggagcat

```
gagcatttcgaagtttttagatgcactagaacaaagcgtgtggcttcctctgagccgcttccttatatacccgattctgcagcctt
acagaatgttctagaaggtcctagatgcattcgttgaaaatactcccgggtgggtgcaaagagacgcagacggaaaatgtatctgg
gtctctttattgtgtacactactttccatgtaccgaaatgtgagtcgccctcctttgcaacaagcagctcgaatgttctagaaaaagggtg
gaaaatagtataaataccgttgaaaataaataccgaacaacattgctctaattgtgaaattagaaatctcaactataatcATGg
attacaaggatgacgacgataagaagctt
```

**Red** – HindIII cloning sites

Underline – FLAG sequence

ATG – start codon

**Green** – GFP sequence

***Bold italics*** – Signal sequence-transmembrane domain

**Bold** – *his-58* sequence
